# Supplementary material for: hESC-Derived Dopaminergic Transplants Integrate into Basal Ganglia Circuitry in a Preclinical Model of Parkinson’s Disease
Source: PubMed Central journal article supplement — Cell Rep. 2019 Sep 24;28(13):3462–3473.e5. doi: 10.1016/j.celrep.2019.08.058 (PMC6899556; doi:10.1016/j.celrep.2019.08.058), 2019-09-24
Supplement: mmc1.pdf [file mmc1.pdf]

**Cell Reports, Volume 28**

**Supplemental Information**

**hESC-Derived Dopaminergic Transplants**

**Integrate into Basal Ganglia Circuitry**

**in a Preclinical Model of Parkinson's Disease**

**Andrew F. Adler, Tiago Cardoso, Sara Nolbrant, Bengt Mattsson, Deirdre B. Hoban, Ulla Jarl, Jenny Nelander Wahlestedt, Shane Grealish, Anders Björklund, and Malin Parmar**

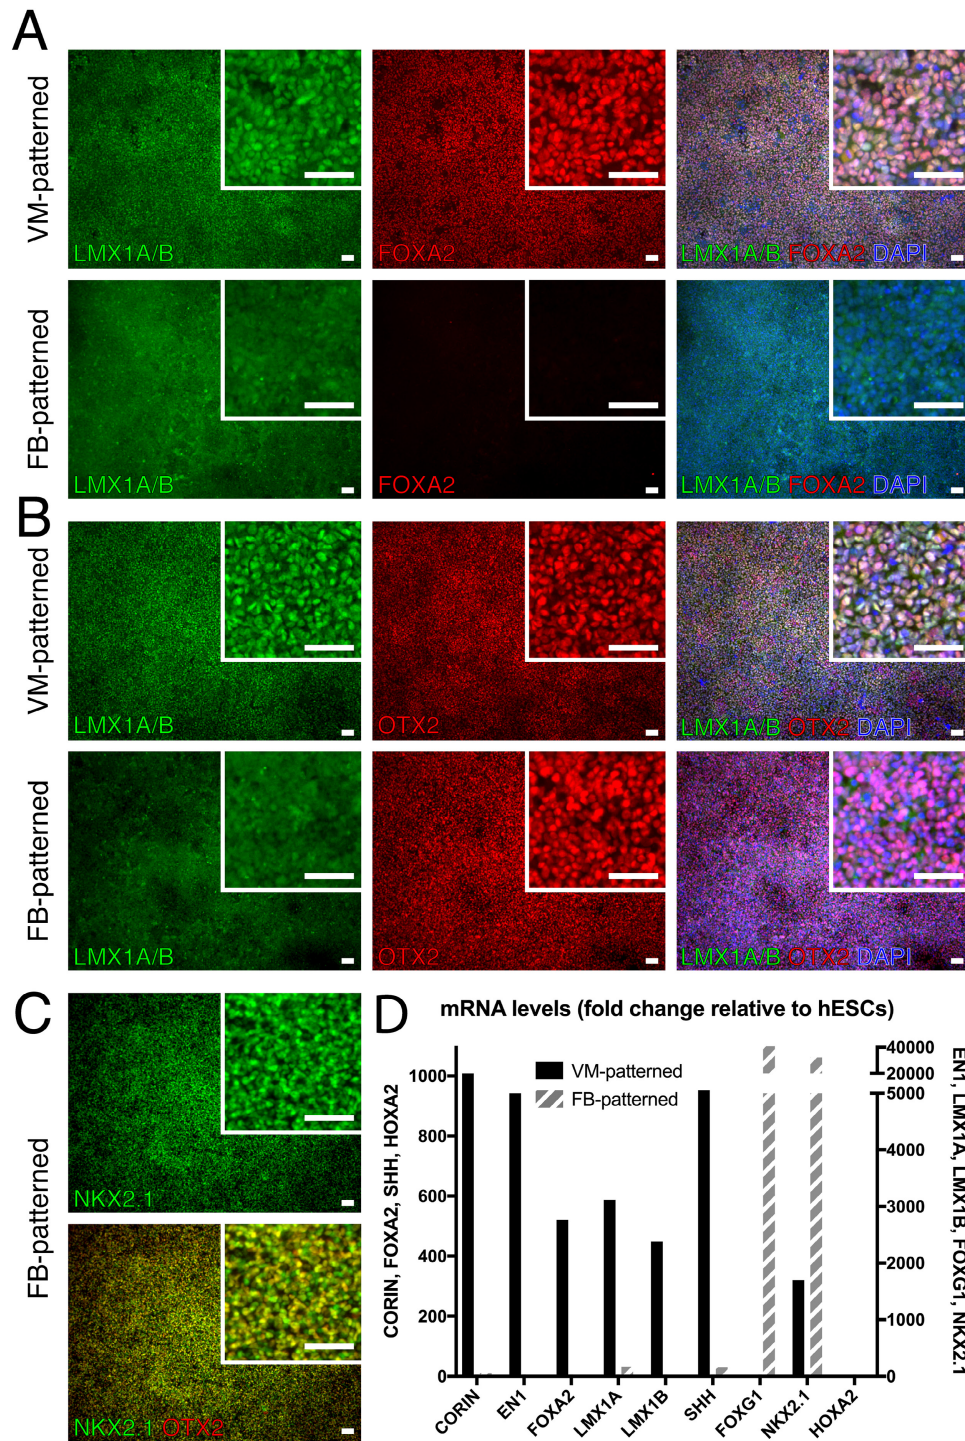

**Figure S1. *In vitro* characterization of ventral midbrain- and ventral forebrain-patterned cell grafts (related to Fig. 1)**

(A) At day 14 of differentiation, hESC-derived VM-patterned progenitors co-expressed ventral midbrain markers LMX1A/B and FOXA2, while FB-patterned progenitors did not, and (B) both cell sources expressed the anterior marker OTX2. (C) At day 21 of differentiation, FB-patterned progenitors expressed the ventral forebrain marker NKX2.1. (D) qPCR analysis at day 14 of differentiation (two days before grafting) revealed VM- and FB-patterned cells adopted ventral midbrain and ventral forebrain fates, respectively, without expression of the hindbrain marker *HOXA2*.

Scale bars represent 100  $\mu$ m. DAPI = 4',6-diamidino-2-phenylindole; EN1 = homeobox protein engrailed-1; FB = forebrain; FOXA2 = forkhead box A2; HOXA2 = homeobox A2; LMX1A/B = LIM homeobox transcription factor 1 alpha/beta; NKX2.1 = NK2 homeobox 1; OTX2 = orthodenticle homeobox 2; SHH = sonic hedgehog; VM = ventral midbrain

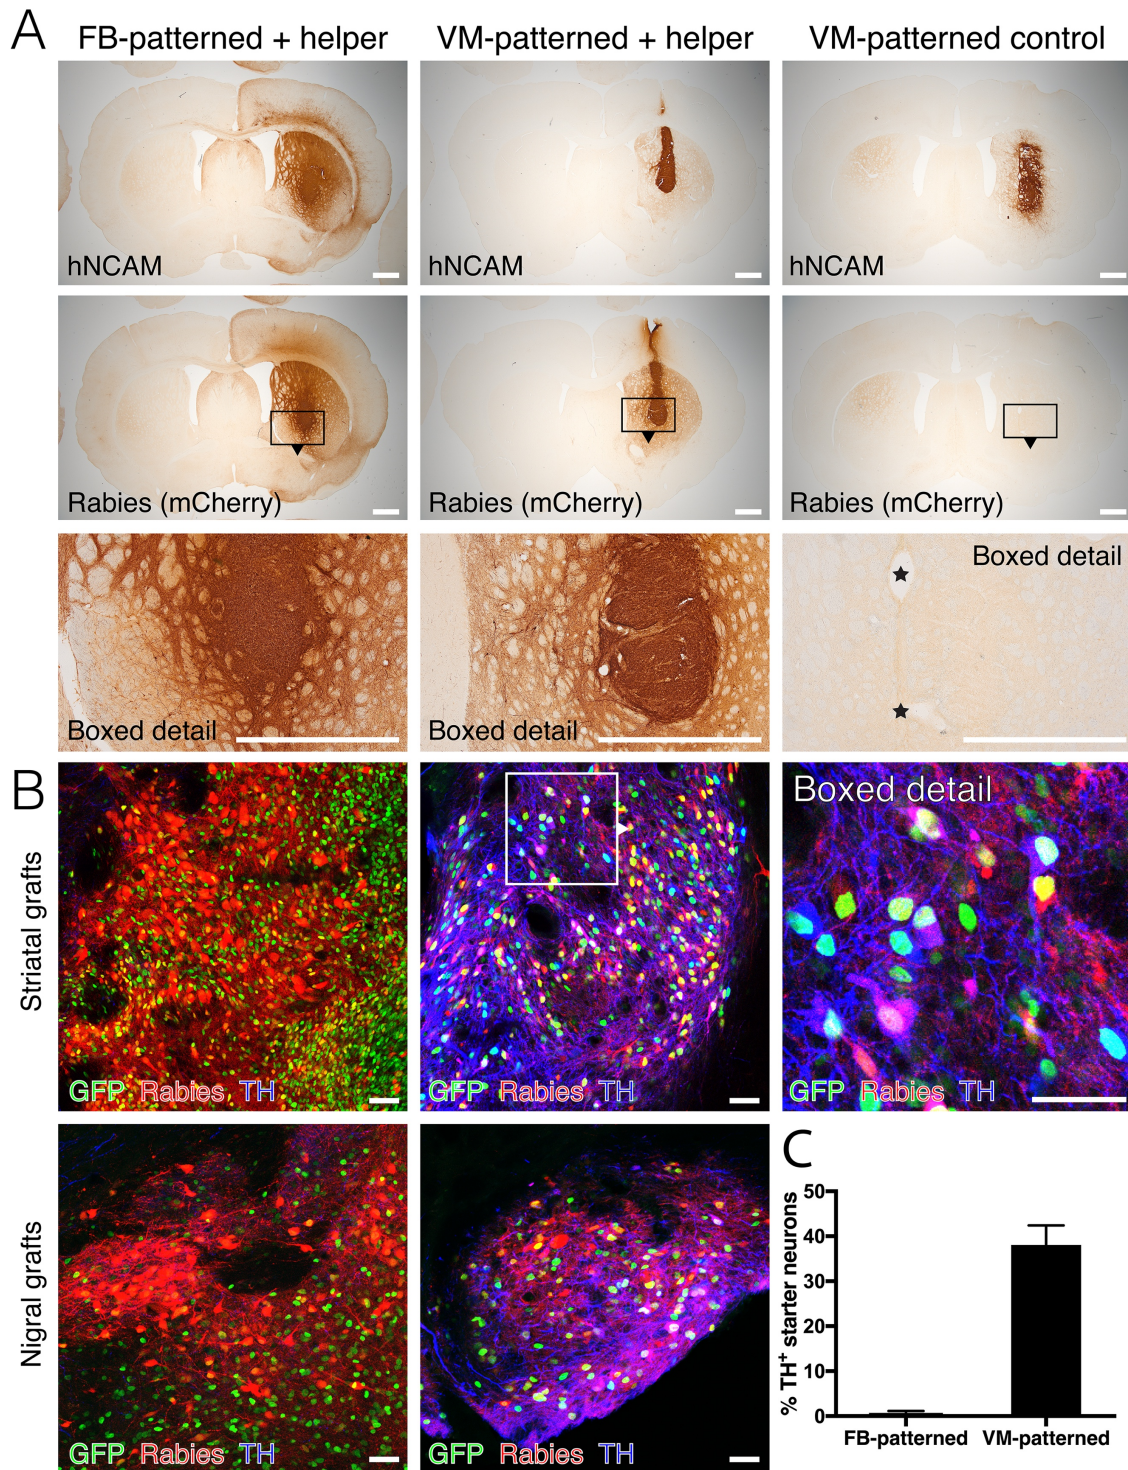

**Figure S2. EnvA-pseudotyped  $\Delta$ G-rabies tracing starter cell characterization (related to Fig. 4)**

(A) hNCAM and  $\Delta$ G-rabies (mCherry) staining reveals both FB- and VM-patterned progenitor cells generate neuron-rich grafts, but only animals grafted with cells pre-transduced with the rabies helper construct express mCherry upon injection of EnvA-pseudotyped mCherry  $\Delta$ G-rabies virus. Stars indicate rabies injection sites for a 6 week VM-patterned control graft. (B) Analysis of intrastriatal and intranigral graft-derived “starter” cells, expressing both mCherry ( $\Delta$ G-rabies) and nuclear GFP (rabies helper construct), reveals that (C)  $38 \pm 4.3$  % of VM-patterned starter neurons were TH<sup>+</sup> (mean + SEM, VM-patterned grafts, n = 8 animals; FB-patterned grafts, n = 11 animals).

Scale bars represent 1 mm (A), 50  $\mu$ m (B). FB = forebrain; GFP = green fluorescent protein; hNCAM = human neural cell adhesion molecule; TH = tyrosine hydroxylase; VM = ventral midbrain

|               | <b>Forward</b>         | <b>Reverse</b>          |
|---------------|------------------------|-------------------------|
| <i>ACTB</i>   | CCTTGCACATGCCGGAG      | GCACAGAGCCTCGCCTT       |
| <i>CORIN</i>  | CATATCTCCATCGCCTCAGTTG | GGCAGGAGTCCATGACTGT     |
| <i>EN1</i>    | CGTGGCTTACTCCCCATTTA   | TCTCGCTGTCTCTCCCTCTC    |
| <i>FOXA2</i>  | CCGTTCTCCATCAACAACCT   | GGGGTAGTGCATCACCTGTT    |
| <i>FOXG1</i>  | TGGCCCATGTGCGCCCTTCT   | GCCGACGTGGTGCCGTTGTA    |
| <i>GAPDH</i>  | TTGAGGTCAATGAAGGGGTC   | GAAGGTGAAGGTCGGAGTCA    |
| <i>HOXA2</i>  | CGTCGCTCGCTGAGTGCCTG   | TGTCGAGTGTGAAAGCGTCGAGG |
| <i>LMX1A</i>  | CGCATCGTTTCTTCTCCTCT   | CAGACAGACTTGGGGCTCAC    |
| <i>LMX1B</i>  | CTTAACCAGCCTCAGCGACT   | TCAGGAGGCGAAGTAGGAAC    |
| <i>NKX2.1</i> | AGGGCGGGGCACAGATTGGA   | GCTGGCAGAGTGTGCCCAGA    |
| <i>SHH</i>    | CCAATTACAACCCCGACATC   | AGTTTCACTCCTGGCCACTG    |

**Table S1. Primer sequences (related to STAR Methods)**
